CI 0.47 to 0.91;  $p=0.01$ ) see Table 2. Main cause of hospitalization was cardio-cerebrovascular (Table 3). We observed no differences in hospitalization duration or survival.

**Table 1. Baseline characteristics of the study population according to dialyzers.**

| Characteristics                       | HF-HD<br>n= 534 | HDx<br>n= 564   | P-value |
|---------------------------------------|-----------------|-----------------|---------|
| Age, mean (SD)                        | 60.39 (14.86)   | 60.79 (15.01)   | 0.66    |
| Age category; N (%)                   |                 |                 |         |
| 18 – 44                               | 85 (15.92)      | 87 (15.43)      |         |
| 45 – 64                               | 211 (39.51)     | 218 (38.65)     | 0.90    |
| >=65                                  | 238 (44.57)     | 259 (45.92)     |         |
| Female; N (%)                         | 186 (34.83)     | 228 (40.43)     | 0.06    |
| Race                                  |                 |                 |         |
| African-American                      | 55 (10.30)      | 28 (4.96)       | 0.00    |
| Mestizo                               | 479 (89.70)     | 536 (95.04)     |         |
| CKD cause; N (%)                      |                 |                 |         |
| Hypertension                          | 152 (28.46)     | 168 (29.79)     |         |
| Diabetes                              | 192 (35.96)     | 217 (38.48)     |         |
| Glomerular disease                    | 41 (7.68)       | 44 (7.80)       | 0.49    |
| Obstructive                           | 37 (6.93)       | 35 (6.21)       |         |
| Polycystic kidney disease             | 14 (2.62)       | 16 (2.84)       |         |
| Unknown                               | 64 (11.99)      | 64 (11.35)      |         |
| Other                                 | 34 (6.37)       | 20 (3.55)       |         |
| Diabetes history, n (%)               | 214 (40.07)     | 246 (43.62)     | 0.23    |
| Hypertension history                  | 491 (91.95)     | 540 (95.74)     | 0.01    |
| Cardiovascular disease history, n (%) | 86 (16.10)      | 121 (21.45)     | 0.02    |
| Comorbidity index, mean (SD)          | 2.039 (1.792)   | 2.170 (1.946)   | 0.43    |
| Karnofsky scale, mean (SD)            | 75.581 (15.913) | 78.528 (13.842) | 0.01    |
| Dialysis vintage, mean (SD)           | 5.60 (5.51)     | 5.88 (5.48)     | 0.40    |
| Hemoglobin, mean (SD) g/dL            | 11.55 (1.92)    | 11.88 (1.74)    | 0.00    |
| Albumin, mean (SD) g/dL               | 3.95 (0.45)     | 4.02 (0.34)     | 0.00    |
| Urine output, mean (SD)               | 1.266 (0.442)   | 1.270 (0.444)   | 0.89    |

MO880

#### **EFFECTIVENESS OF MEDIUM CUT-OFF VS HIGH FLUX DIALYZERS: A PROPENSITY SCORE MATCHING COHORT STUDY**

Alejandra Molano-Triviño<sup>1</sup>, Mauricio Sanabria<sup>2</sup>, Jasmin Vesga<sup>3</sup>, Giancarlo Buitrago<sup>4</sup>, Ricardo Sánchez<sup>4</sup>, Angela Rivera<sup>5</sup>

<sup>1</sup>Baxter Renal Care Services- Fundación Cardioinfantil, Bogotá, Colombia, <sup>2</sup>Baxter Renal Care Services Latin-America, Bogotá, Colombia, <sup>3</sup>Baxter Renal Care Services-Colombia, Bogotá, Colombia, <sup>4</sup>Universidad Nacional de Colombia, Clinical Research Institute, School of Medicine, Universidad Nacional de Colombia., Bogotá, Colombia and <sup>5</sup>Baxter Healthcare Corporation, Deerfield, IL, United States of America

**BACKGROUND AND AIMS:** According to emerging evidence, medium cut-off membrane improves clearance of molecules larger than 25 kDa, including larger uremic toxins. There is growing evidence on clinical effectiveness outcomes associated with the use of these membranes.

Our aim was to evaluate clinical effectiveness of medium cut-off (HDx) versus high flux (HF-HD) dialyzers in terms of hospitalization rate and duration, cardiovascular event rate and survival in a HD prevalent cohort in Colombia through an observational, multicenter retrospective cohort analysis.

**METHOD:** Adult Prevalent HD patients (> 90 days in HD) at Baxter Renal Care Services Colombia were included between September 1st, 2017 to November 30th, 2017 (follow-up until 2 years). Socio-demographic and clinical characteristics of all patients were summarized descriptively. Inverse probability of treatment weighting on the propensity score was used to balance comparison groups on indicators of baseline socio-demographic and clinical characteristics. Weighted incidence rate ratios (IRRs) and rates and duration of hospitalization and cardiovascular events according to dialyzer type were obtained using binomial negative regression with the weighting sample.

**RESULTS:** We evaluated 1098 patients (37.7% women): 534 in HF-HD vs 564 in HDx (Table 1), median age was 60.6 years. Mean time on HD was 5.6 years (SD 5.51) for HF-HD and 5.88 for HDx (SD 5.48)

We observed lower hospitalization rates in HDx group, (IRR HDx/HF-HD: 0.82 95% CI 0.69 to 0.98;  $p=0.03$ ); and cardiovascular events rate, (IRR HDx/HF-HD: 0.65 95% CI 0.47 to 0.91;  $p=0.01$ ) see Table 2. Main cause of hospitalization was cardio-cerebrovascular (Table 3). We observed no differences in hospitalization duration or survival.

**CONCLUSION:** We evaluated 1098 patients (37.7% women): 534 in HF-HD vs 564 in HDx (Table 1), median age was 60.6 years. Mean time on HD was 5.6 years (SD 5.51) for HF-HD and 5.88 for HDx (SD 5.48)

We observed lower hospitalization rates in HDx group, (IRR HDx/HF-HD: 0.82 95% CI 0.69 to 0.98;  $p=0.03$ ); and cardiovascular events rate, (IRR HDx/HF-HD: 0.65 95%

**Table 2. Hospitalization, hospital stay and cardio-vascular events for full sample and matched population**

|                               | Full sample (Unadjusted rates) |                |         | Negative binomial regression with weighting sample |               |         |
|-------------------------------|--------------------------------|----------------|---------|----------------------------------------------------|---------------|---------|
|                               | Estimate                       | 95% CI         | P-value | Estimate                                           | 95% CI        | P-value |
| <b>Hospitalization events</b> |                                |                |         |                                                    |               |         |
| Rate per patient-year         |                                |                |         |                                                    |               |         |
| HF-HD                         | 1.065                          | 0.993 ; 1.136  |         | 1.10                                               | 0.95 ; 1.25   |         |
| HDx                           | 0.786                          | 0.729 ; 0.843  |         | 0.90                                               | 0.80 ; 1.00   |         |
| Incidence Rate Ratio          | 0.738                          | 0.669 ; 0.815  | 0.000   | 0.82                                               | 0.69 ; 0.98   | 0.03    |
| <b>Hospital days</b>          |                                |                |         |                                                    |               |         |
| Rate per patient-year         |                                |                |         |                                                    |               |         |
| HF-HD                         | 10.180                         | 9.959 ; 10.401 |         | 13.09                                              | 10.11 ; 16.07 |         |
| HDx                           | 6.451                          | 6.288 ; 6.615  |         | 12.16                                              | 8.95 ; 15.38  |         |
| Incidence Rate Ratio          | 0.634                          | 0.613 ; 0.655  | 0.000   | 0.93                                               | 0.66 ; 1.32   | 0.68    |
| <b>Cardiovascular events</b>  |                                |                |         |                                                    |               |         |
| Rate per patient-year         |                                |                |         |                                                    |               |         |
| HF-HD                         | 0.246                          | 0.211 ; 0.280  |         | 0.27                                               | 0.20 ; 0.33   |         |
| HDx                           | 0.158                          | 0.132 ; 0.183  |         | 0.17                                               | 0.14 ; 0.21   |         |
| Incidence Rate Ratio          | 0.643                          | 0.519 ; 0.796  | 0.000   | 0.65                                               | 0.47 ; 0.91   | 0.01    |

**Table 3. Causes of hospitalization in the full sample according to exposure status.**

| Causes of hospitalization                  | Full sample |                | HDx        |                | HF-HD      |                |
|--------------------------------------------|-------------|----------------|------------|----------------|------------|----------------|
|                                            | N           | %              | N          | %              | N          | %              |
| Bacteremia/septicemia/infections           | 111         | 7,021          | 46         | 6,327          | 65         | 7,611          |
| Cardiovascular and cerebrovascular disease | 473         | 29,918         | 207        | 28,473         | 266        | 31,148         |
| Genitourinary diseases                     | 80          | 5,060          | 33         | 4,539          | 47         | 5,504          |
| Central nervous system diseases            | 22          | 1,392          | 10         | 1,376          | 12         | 1,405          |
| Musculoskeletal diseases                   | 36          | 2,277          | 15         | 2,063          | 21         | 2,459          |
| Respiratory system diseases                | 161         | 10,183         | 80         | 11,004         | 81         | 9,485          |
| Hematopoietic diseases                     | 53          | 3,352          | 14         | 1,926          | 39         | 4,567          |
| Endocrine and metabolic diseases           | 97          | 6,135          | 47         | 6,465          | 50         | 5,855          |
| Digestive system diseases                  | 180         | 11,385         | 97         | 13,343         | 83         | 9,719          |
| Others                                     | 192         | 12,144         | 97         | 13,343         | 95         | 11,124         |
| Skin and subcutaneous tissue disorders     | 60          | 3,795          | 23         | 3,164          | 37         | 4,333          |
| Mental disorders                           | 11          | 0,696          | 5          | 0,688          | 6          | 0,703          |
| Traumatic lesions                          | 66          | 4,175          | 35         | 4,814          | 31         | 3,630          |
| Tumour/Neoplasia                           | 32          | 2,024          | 16         | 2,201          | 16         | 1,874          |
| Unknown                                    | 7           | 0,443          | 2          | 0,275          | 5          | 0,585          |
| <b>Total</b>                               | <b>1581</b> | <b>100,000</b> | <b>727</b> | <b>100,000</b> | <b>854</b> | <b>100,000</b> |
